# Supplementary material
Source: PubMed Central journal article supplement (PMC4109491)
Supplement: supp_114.214312_JPET214312Supplemental_Figures.pdf [file supp_114.214312_JPET214312Supplemental_Figures.pdf]

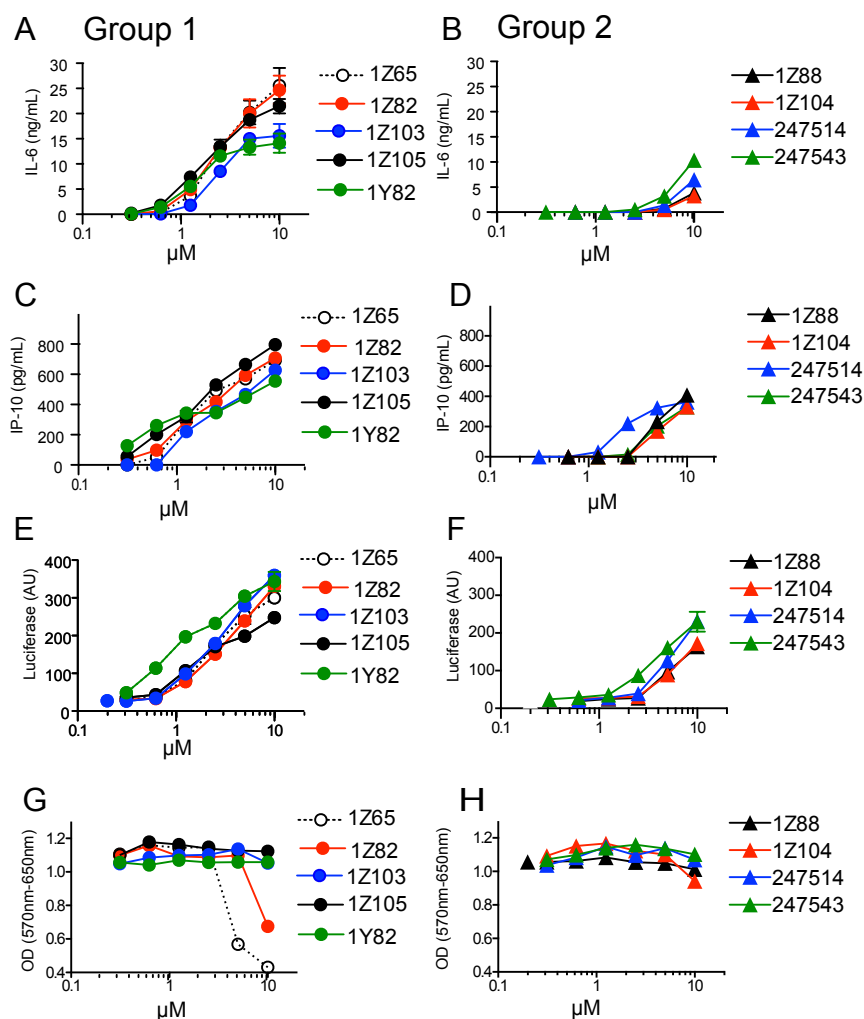

Supplemental Figure 1. Dose dependent cytokine production and toxicity. WT C57BL/6 BMDC were plated at  $1 \times 10^5$  cells/well and were incubated with graded concentrations of each compound overnight. IL-6 (A and B) and IP-10 (C and D) levels were measured by ELISA. Type 1 IFN levels were measured by IRSE reporter assay (E and F). Control wells included LPS (10ng/mL) or MPLA (1  $\mu\text{g}/\text{mL}$ ). Induction of IL-6 and IP-10 by LPS was  $17.3 \pm 2.4$  ng/mL and  $387 \pm 16$  pg/mL, respectively. Induction of IL-6 and IP-10 by MPLA were  $3.8 \pm 0.2$  ng/mL and  $106 \pm 39$  pg/mL, respectively. The type 1 IFN level induced by MPLA (1  $\mu\text{g}/\text{mL}$ ) was  $53 \pm 1.5$  AU. Hep G2 cells in 96-well plates were exposed to compounds for 24 hours and cell viabilities were measured by a tetrazolium (MTT) assay (G and H). The OD(570-650) was  $1.14 \pm 0.01$  for the vehicle control treated wells. All data shown are mean  $\pm$  SEM of triplicates and representative of two independent experiments.

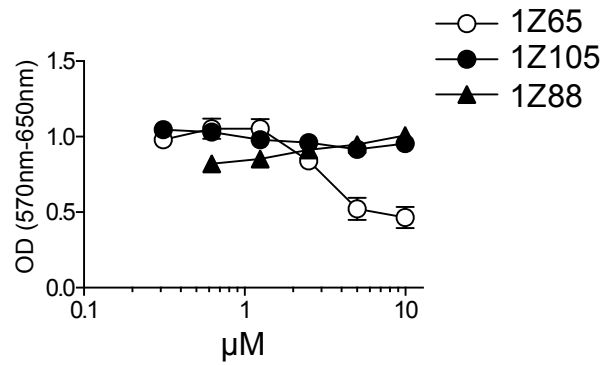

Supplemental Figure 2. Dose dependent toxicity of 1Z65, 1Z105 and 1Z88. WT C57BL/6 BMDC were plated at  $1 \times 10^5$  cells/well and were incubated with graded concentrations of each compound overnight. Cell viabilities were measured by MTT assay. The OD(570-650) was  $0.98 \pm 0.03$  for the vehicle control treated wells. All data shown are mean  $\pm$  SEM of triplicates and representative of two independent experiments.

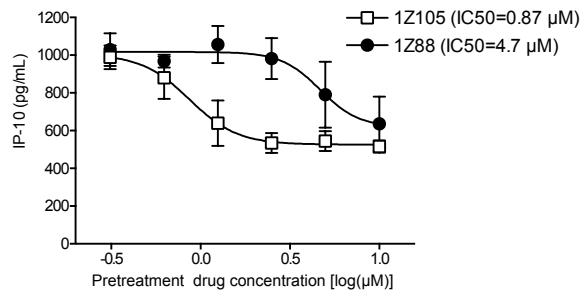

Supplemental Figure 3. Desensitization of IP-10 release by BMDM by pretreatment with 1Z105 and 1Z88. WT C57BL/6 BMDM were plated at  $5 \times 10^4$  cells/well and were incubated with graded concentrations of 1Z105 or 1Z88 overnight. The cells were then challenged with LPS (10 ng/mL) and cytokine release in the culture supernatants after 18 h was assessed by ELISA. Data shown are mean  $\pm$  SEM.

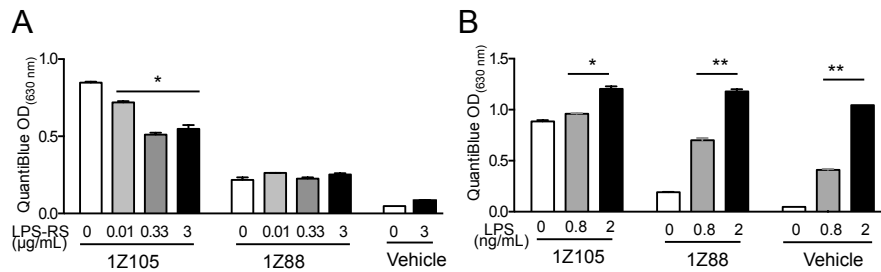

Supplemental Figure 4. Costimulation of LPS-RS or LPS with 1Z105 or 1Z88. Murine TLR4-NF- $\kappa$ B reporter cells were incubated with 1Z105 (5  $\mu$ M) or 1Z88 (10  $\mu$ M) in the presence and absence of indicated concentrations of LPS-RS (A) or LPS (B) overnight. NF- $\kappa$ B activation was measured by SEAP release (OD<sub>630</sub>). Data shown are mean  $\pm$  SEM. \* p<0.05; \*\*p<0.01 by one way ANOVA compared to cells without LPS-RS or LPS with Dunnet's post hoc testing.
